# Supplementary material for: 50 years of scanning electron microscopy of bone—a comprehensive overview of the important discoveries made and insights gained into bone material properties in health, disease, and taphonomy
Source: PubMed Central journal article supplement (PMC6531483; doi:10.1038/s41413-019-0053-z), 2019-05-22
Supplement: 41413_2019_53_MOESM27_ESM.pdf [file 41413_2019_53_MOESM27_ESM.pdf]

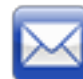

**Title:** Micrometer-Sized Magnesium  
Whitlockite Crystals in  
Micropetrosis of  
Bisphosphonate-Exposed Human  
Alveolar Bone

**Author:** Furqan A. Shah, Bryan E. J. Lee,  
James Tedesco, et al

**Publication:** Nano Letters

**Publisher:** American Chemical Society

**Date:** Oct 1, 2017

Copyright © 2017, American Chemical Society

Logged in as:  
Furqan Shah  
Account #:  
3000820029

LOGOUT

## PERMISSION/LICENSE IS GRANTED FOR YOUR ORDER AT NO CHARGE

This type of permission/license, instead of the standard Terms & Conditions, is sent to you because no fee is being charged for your order. Please note the following:

- Permission is granted for your request in both print and electronic formats, and translations.
- If figures and/or tables were requested, they may be adapted or used in part.
- Please print this page for your records and send a copy of it to your publisher/graduate school.
- Appropriate credit for the requested material should be given as follows: "Reprinted (adapted) with permission from (COMPLETE REFERENCE CITATION). Copyright (YEAR) American Chemical Society." Insert appropriate information in place of the capitalized words.
- One-time permission is granted only for the use specified in your request. No additional uses are granted (such as derivative works or other editions). For any other uses, please submit a new request.

If credit is given to another source for the material you requested, permission must be obtained from that source.

BACK

CLOSE WINDOW
